# Supplementary material for: Expanding the Use of Peroxygenase from Oat Flour in Organic Synthesis: Enantioselective Oxidation of Sulfides
Source: Int J Mol Sci. 2023 Apr 18;24(8):7464. doi: 10.3390/ijms24087464 (PMC10138840; doi:10.3390/ijms24087464)
Supplement: Supplementary file 1 [file ijms-24-07464-s001.zip › ijms-2348143-supplementary.pdf]

# Expanding the use of peroxygenase from oat flour in organic synthesis: enantioselective oxidation of sulfides

Claudia Sanfilippo, Federica Cernuto and Angela Patti\*

*CNR - Istituto di Chimica Biomolecolare, Via Paolo Gaifami 18, I-95126 Catania, Italy*

## SUPPORTING INFORMATION

\*Corresponding author. E-mail: [angela.patti@cnr.it](mailto:angela.patti@cnr.it)

|                                                                                                                               |                   |
|-------------------------------------------------------------------------------------------------------------------------------|-------------------|
| HPLC chromatograms of reference racemic sulfoxides and chiral sulfoxides obtained by biocatalyzed oxidation of sulfides       | Pages SI-1 – SI-5 |
| <b>Figure S1.</b> Variation of the enantiomeric excess of sulfoxide <b>1a</b> at different concentration of sulfone <b>1b</b> | Page SI-6         |
| <b>Figure S2.</b> $^1\text{H}$ - and $^{13}\text{C}$ -NMR spectra of sulfoxide <b>1a</b>                                      | Page SI-7         |
| <b>Figure S3.</b> $^1\text{H}$ - and $^{13}\text{C}$ -NMR spectra of sulfoxide <b>3a</b>                                      | Page SI-8         |

## HPLC analyses

Chiral HPLC analyses were performed on a Phenomenex Lux 5 $\mu$ m Cellulose-1 (250 x 4.6 mm) column eluting with *n*-hexane/EtOH 90:10 at flow 0.5 mL/min. ( $\pm$ )-**1a** was purchased from Aldrich while other racemic samples of sulfoxides were obtained by standard oxidation of the parent sulfides with *m*-Cl-PhCOOOH in CH<sub>2</sub>Cl<sub>2</sub>.

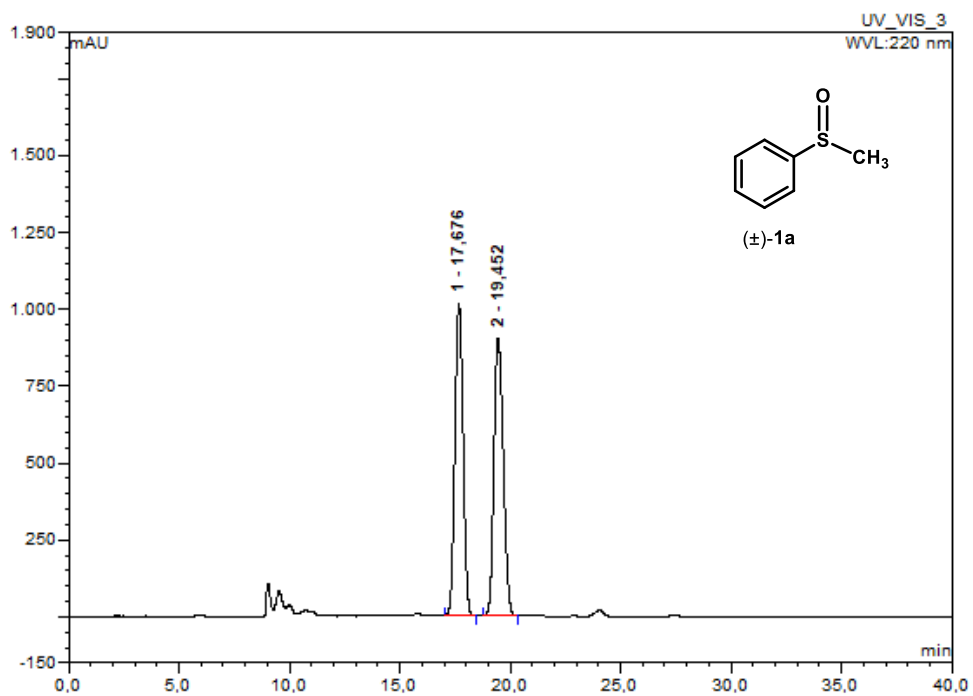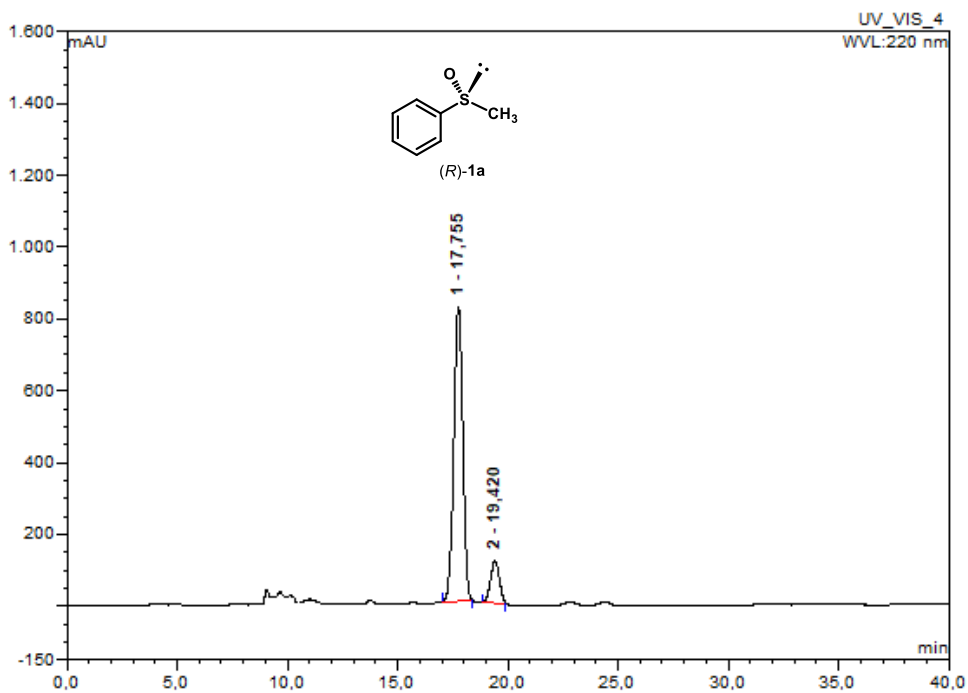

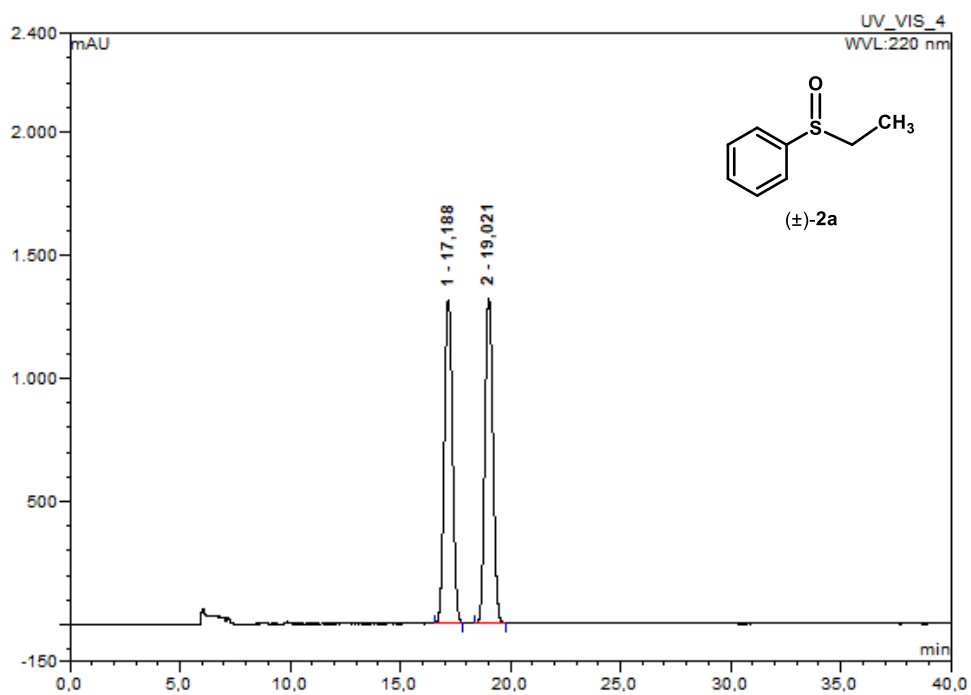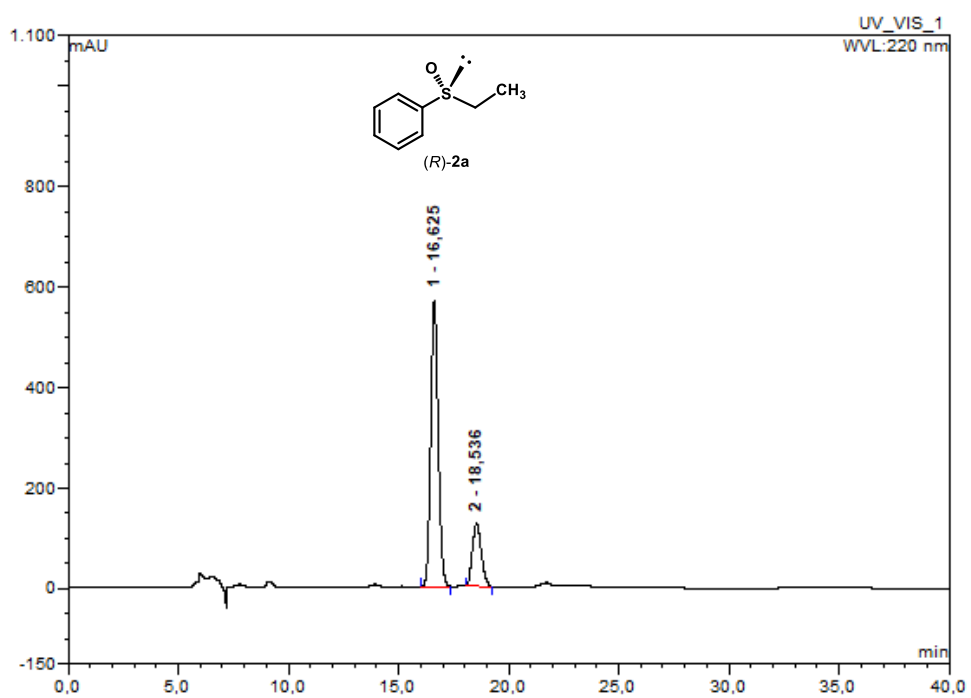

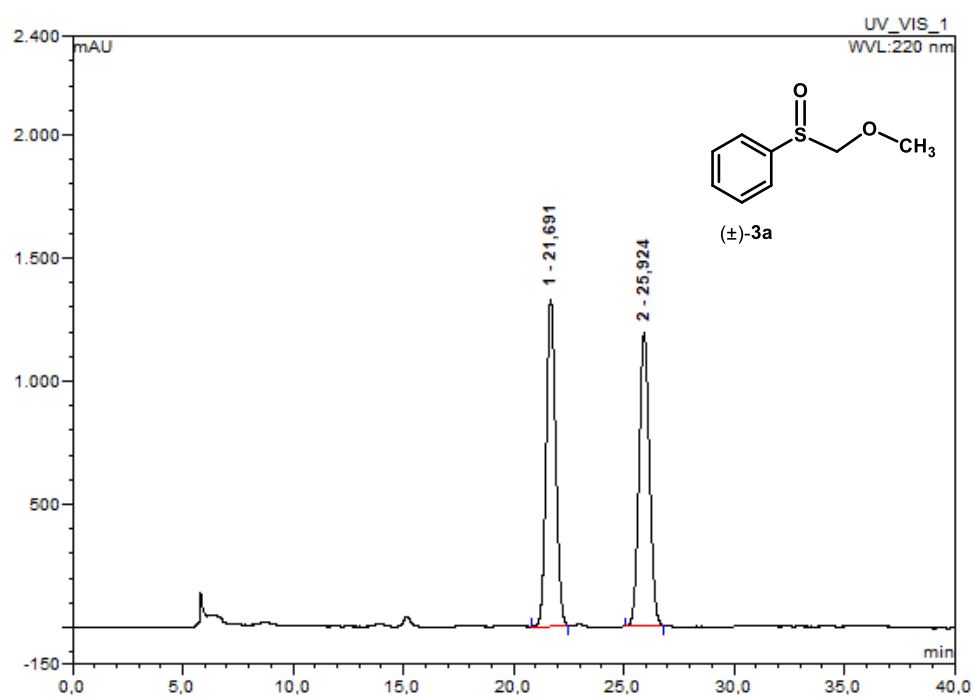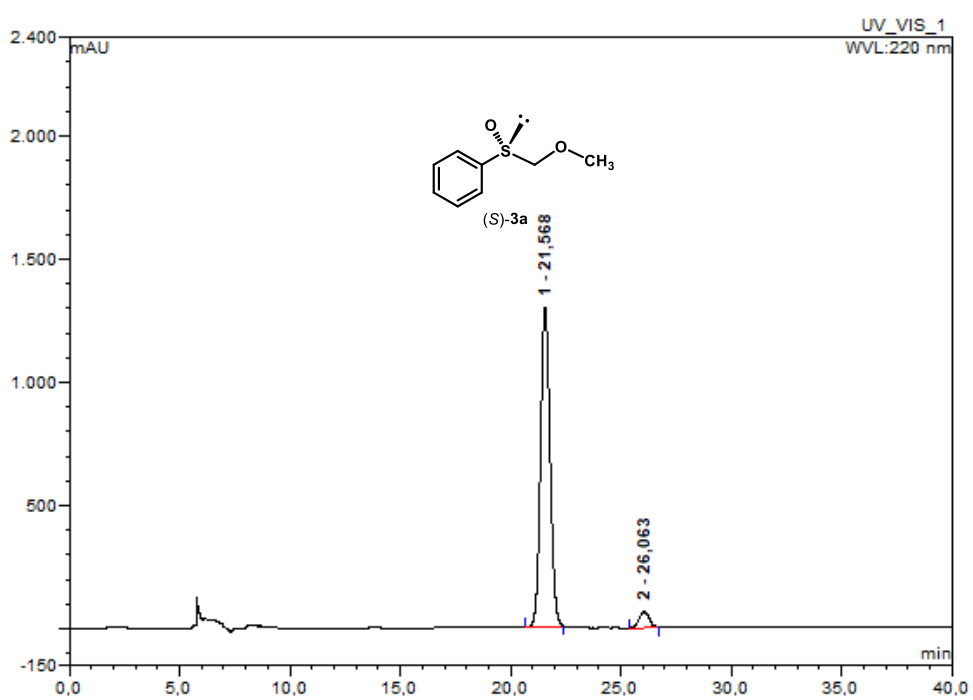

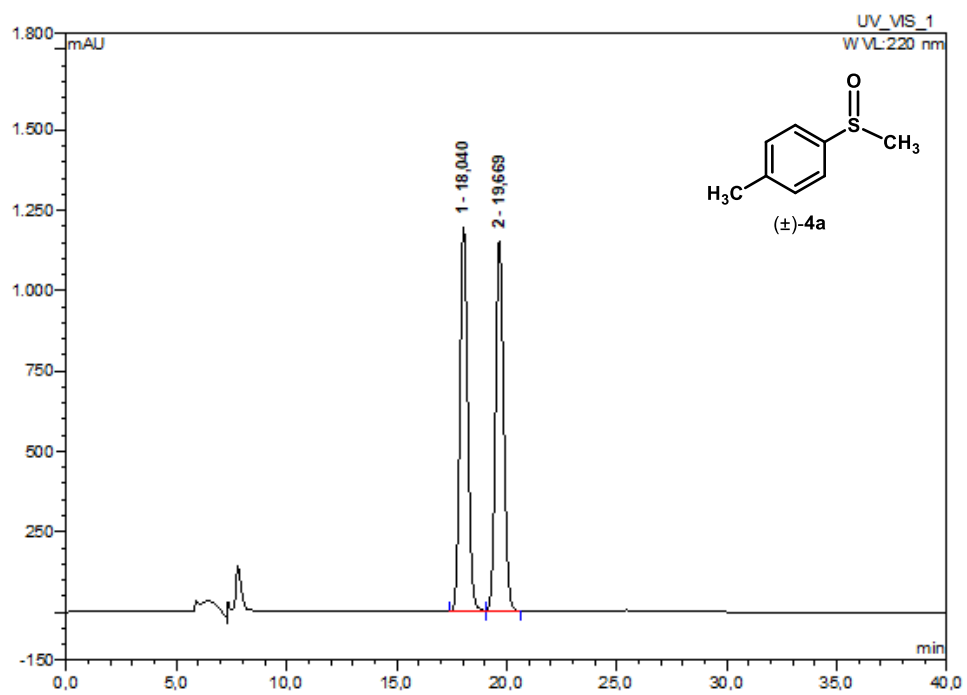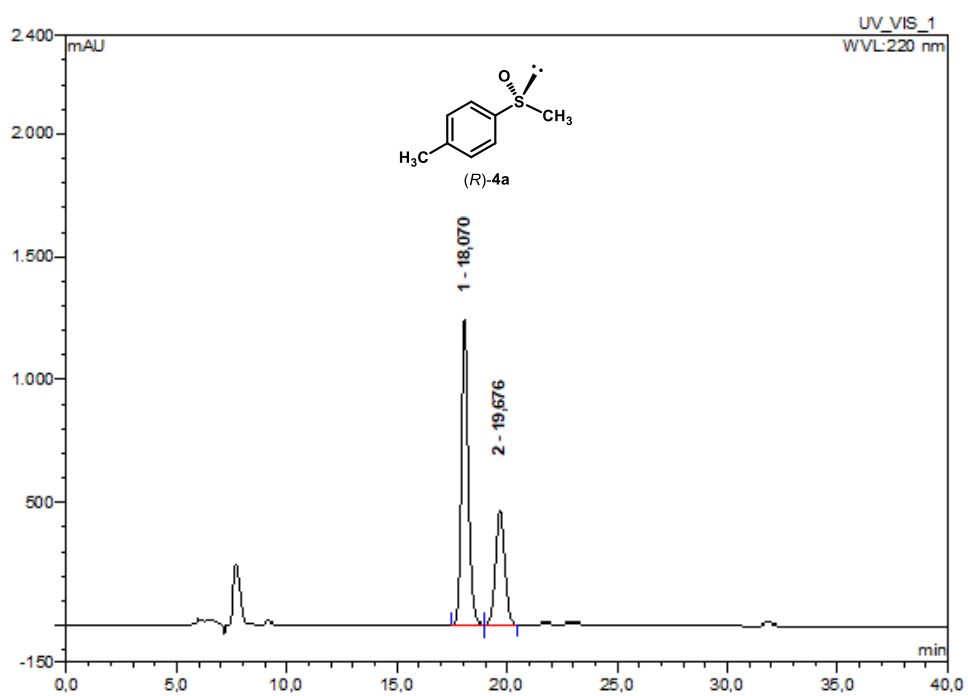

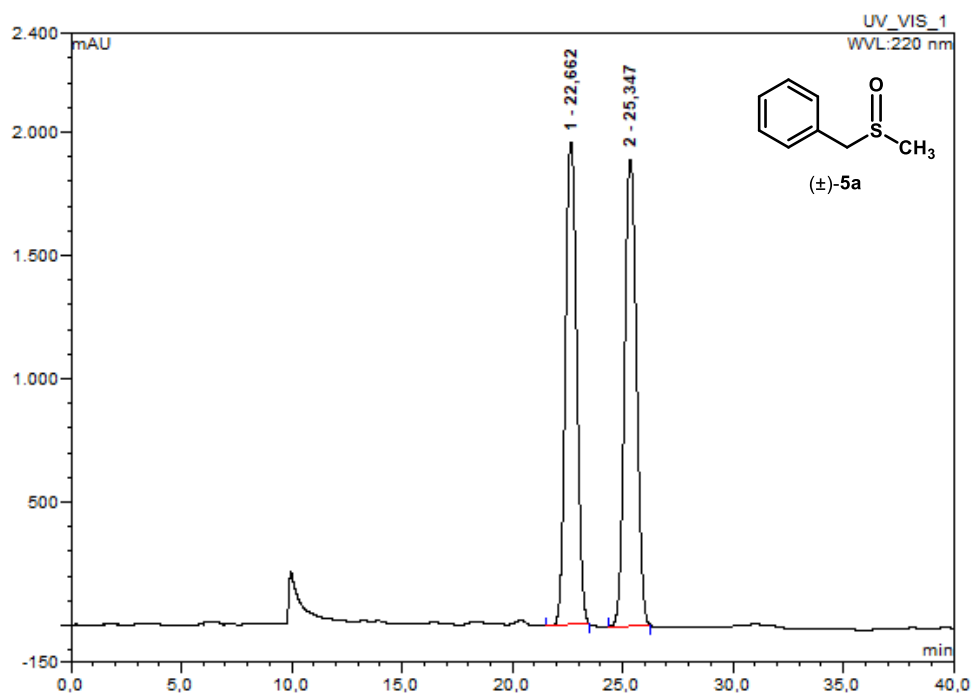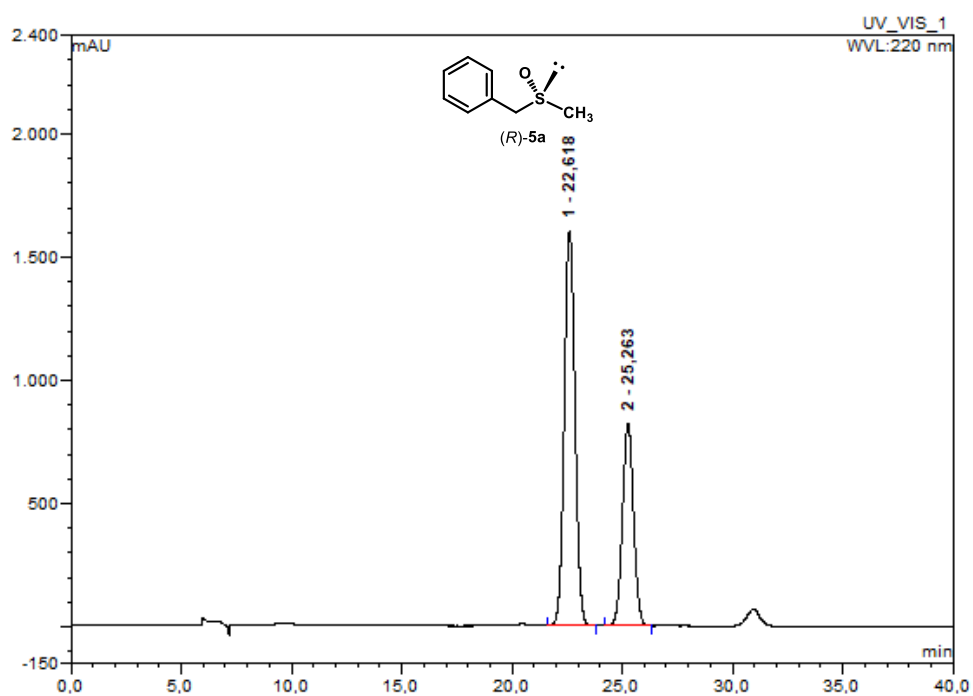

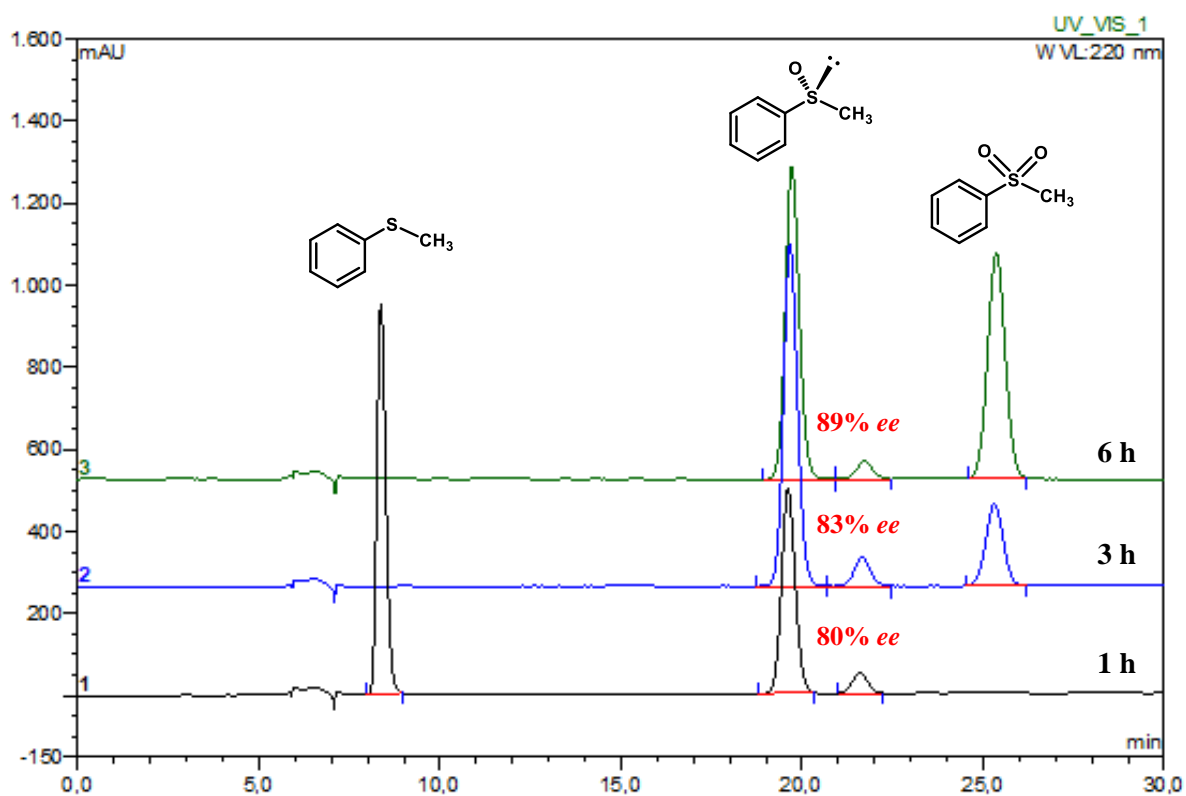

**Figure S1.** Variation of the enantiomeric excess of sulfoxide **1a** at different concentration of sulfone **1b**

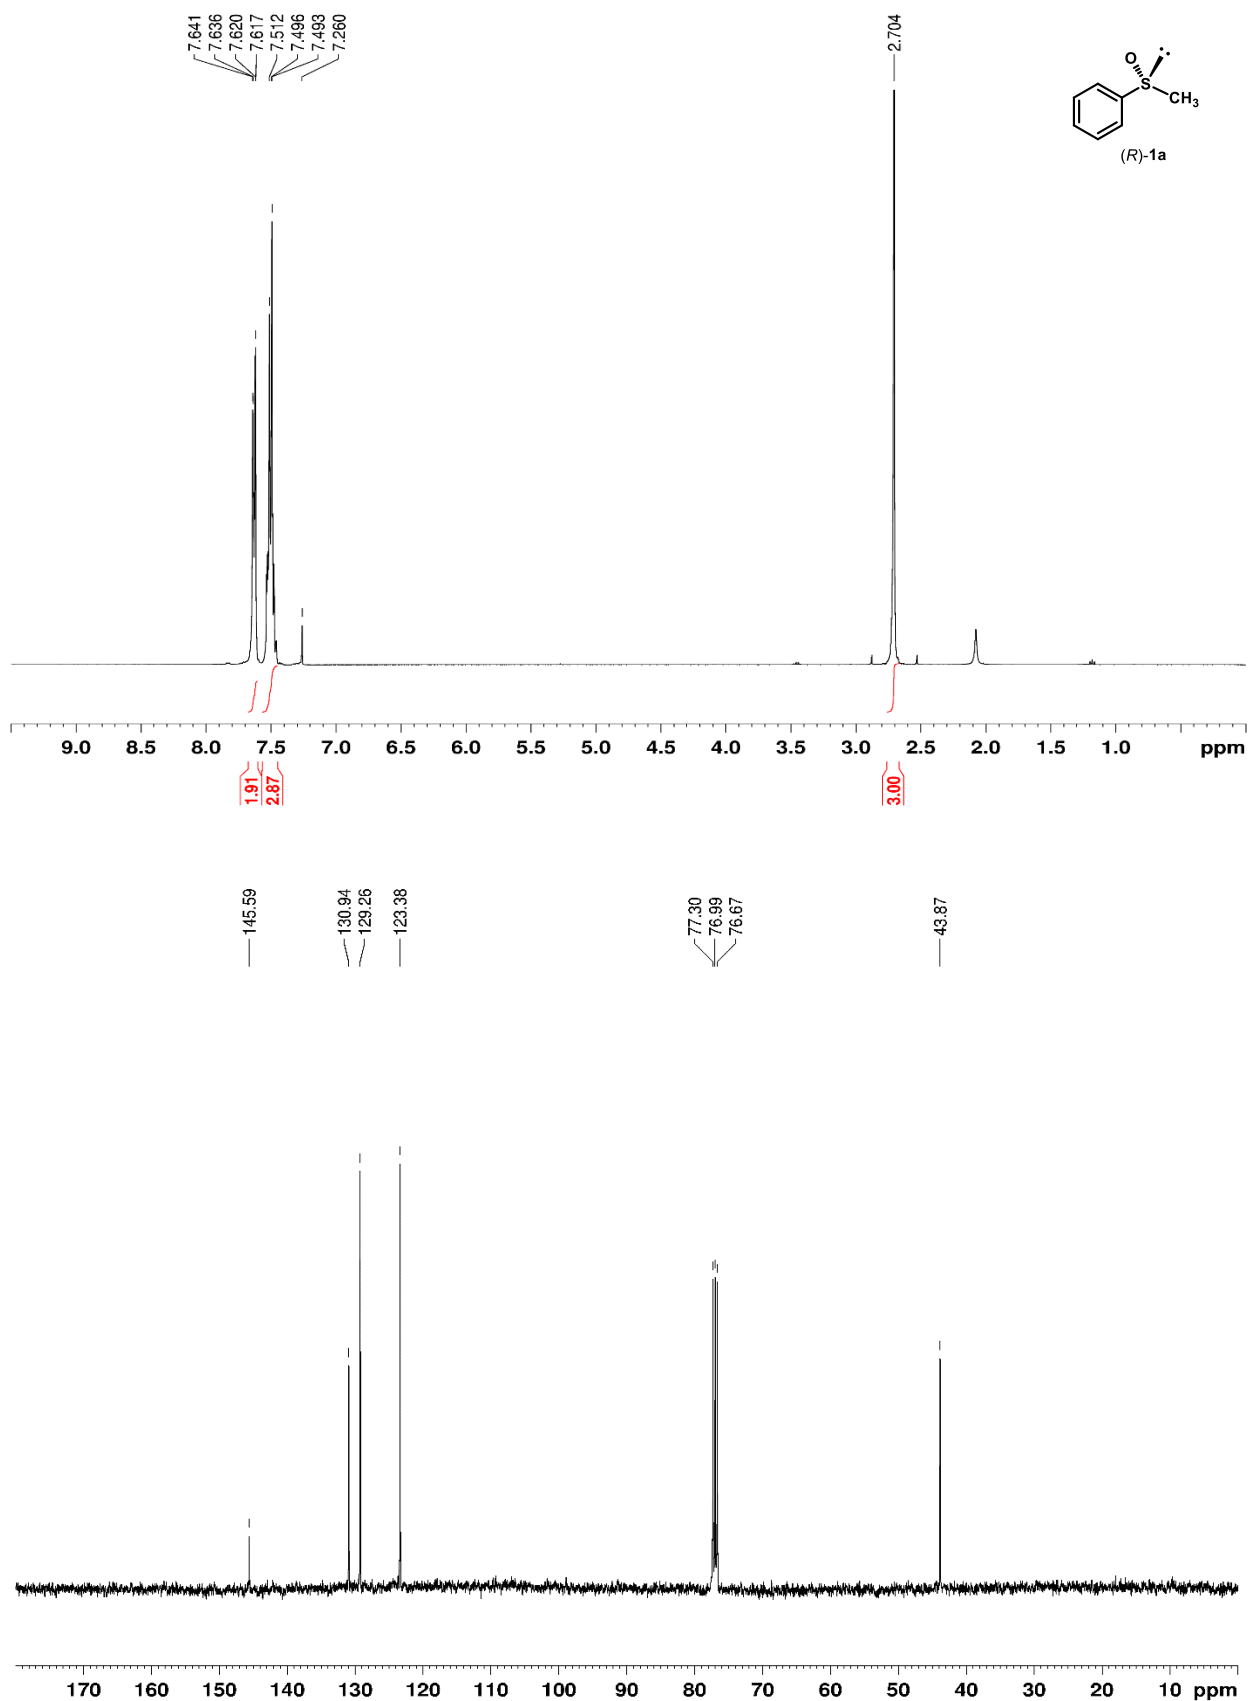

Figure S2. <sup>1</sup>H- and <sup>13</sup>C-NMR spectra of sulfoxide **1a**

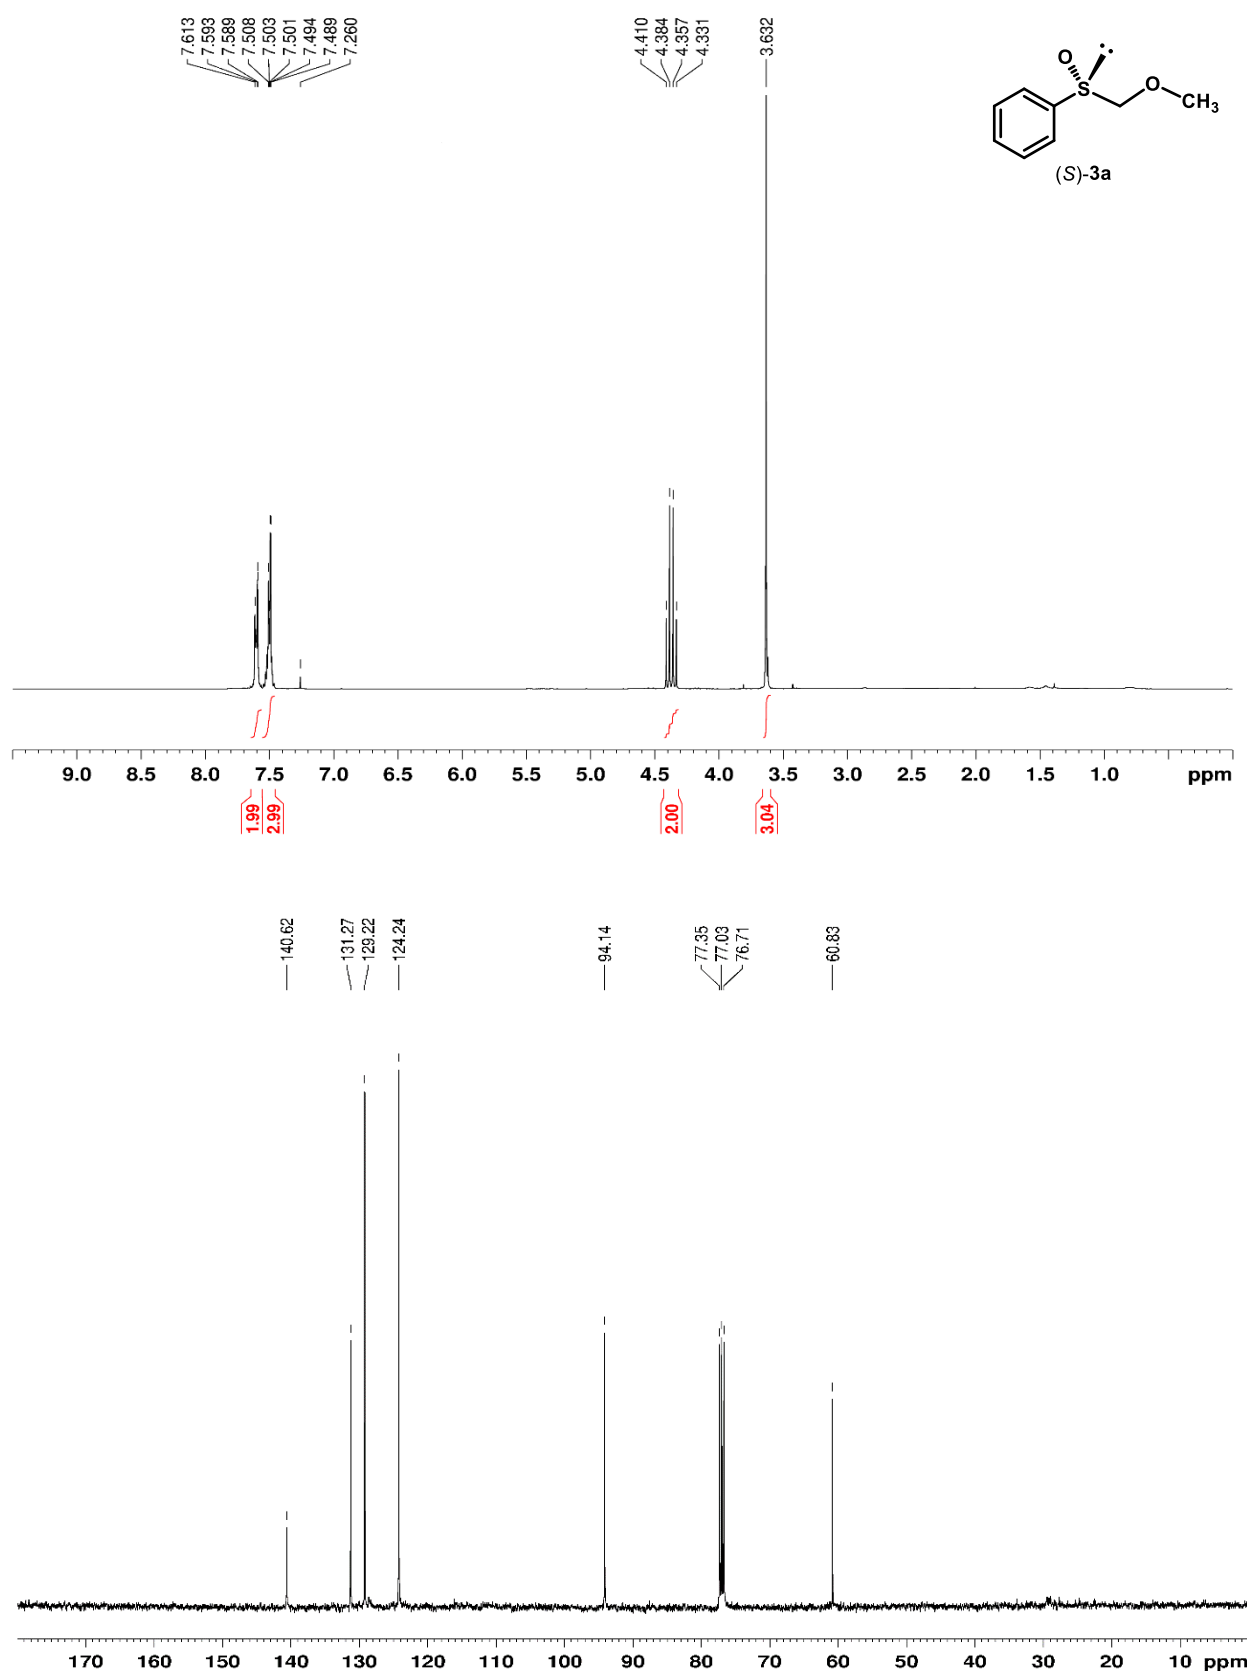

Figure S3. <sup>1</sup>H- and <sup>13</sup>C-NMR spectra of sulfoxide **3a**
